# Supplementary material for: Hierarchical cortical transcriptome disorganization in autism
Source: Springer Nature journal article supplement (doi:10.1186/s13229-017-0147-7), 2017-06-21

# Scale Free Topology Model Fit

Scale Free Topology Model Fit

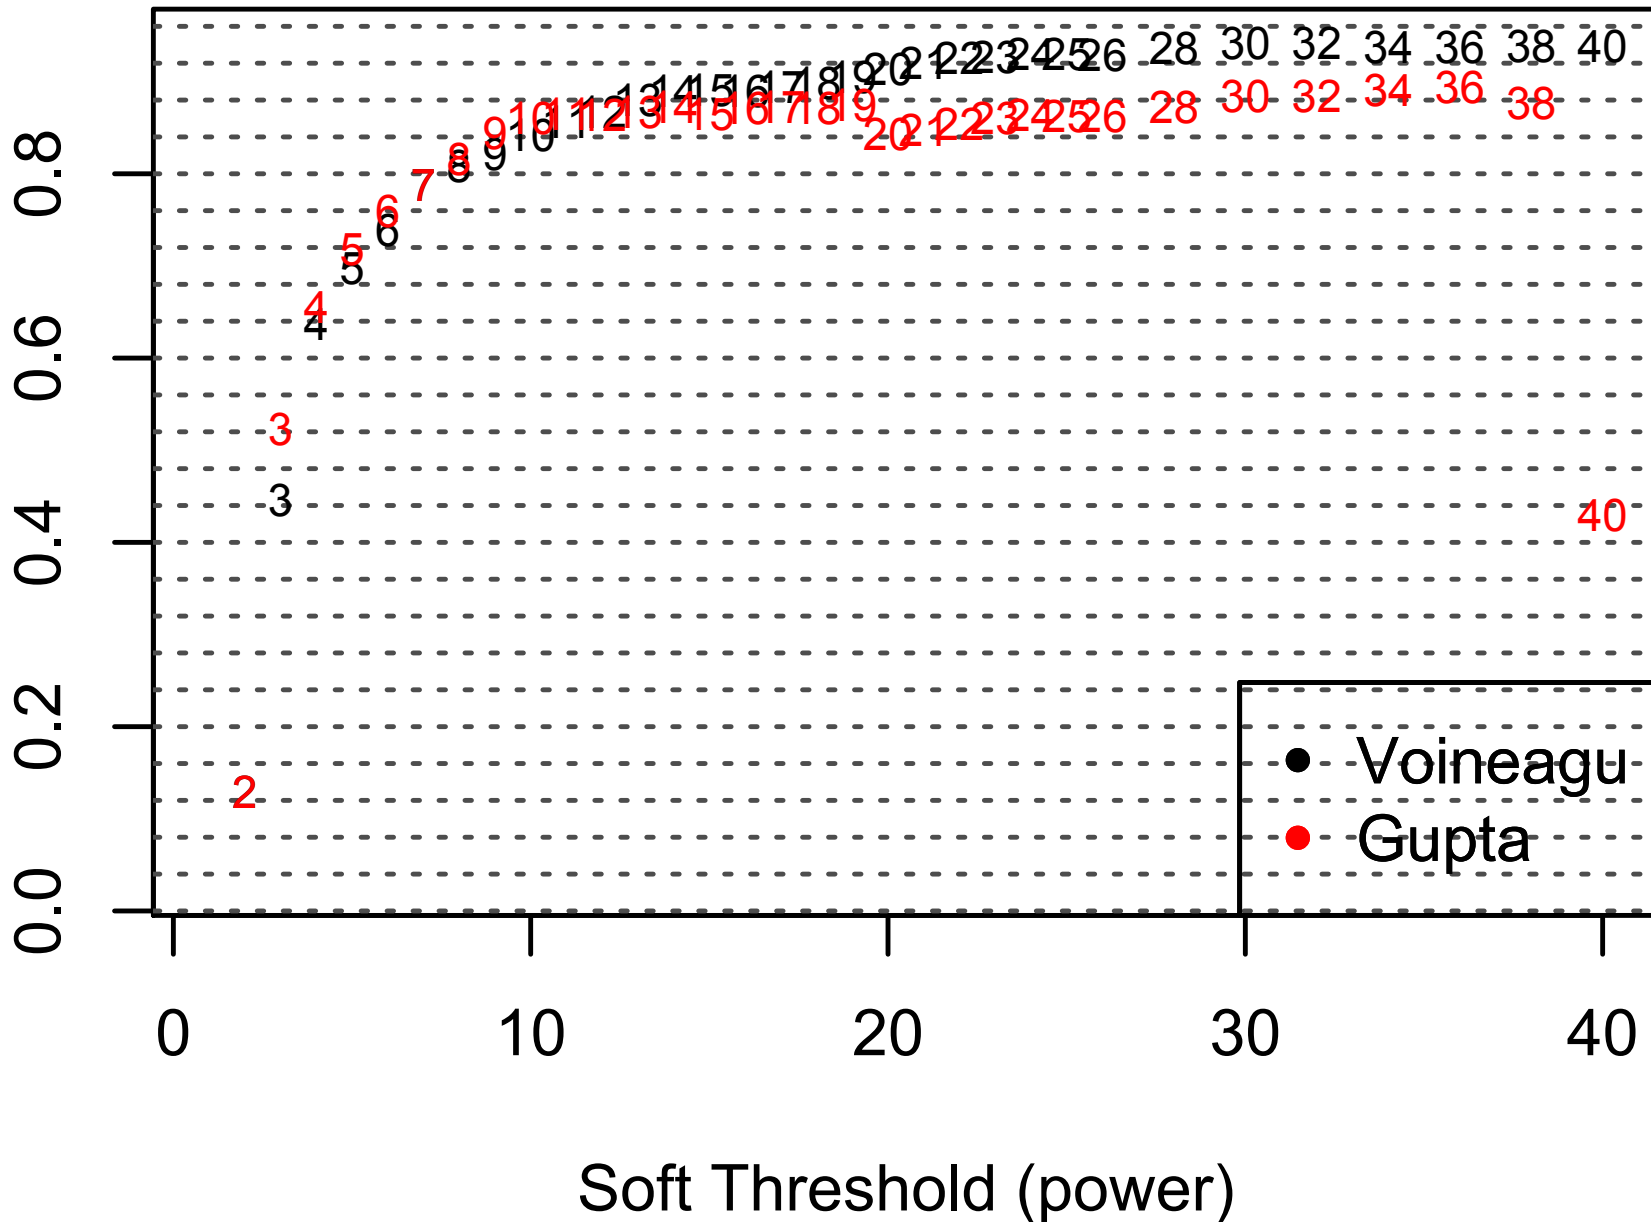

Supplement: MOESM1 [file 12461634]
