# Supplementary material for: Hierarchical cortical transcriptome disorganization in autism
Source: Springer Nature journal article supplement (doi:10.1186/s13229-017-0147-7), 2017-06-21
Supplement: MOESM6 [file 12461634]

# Voineagu

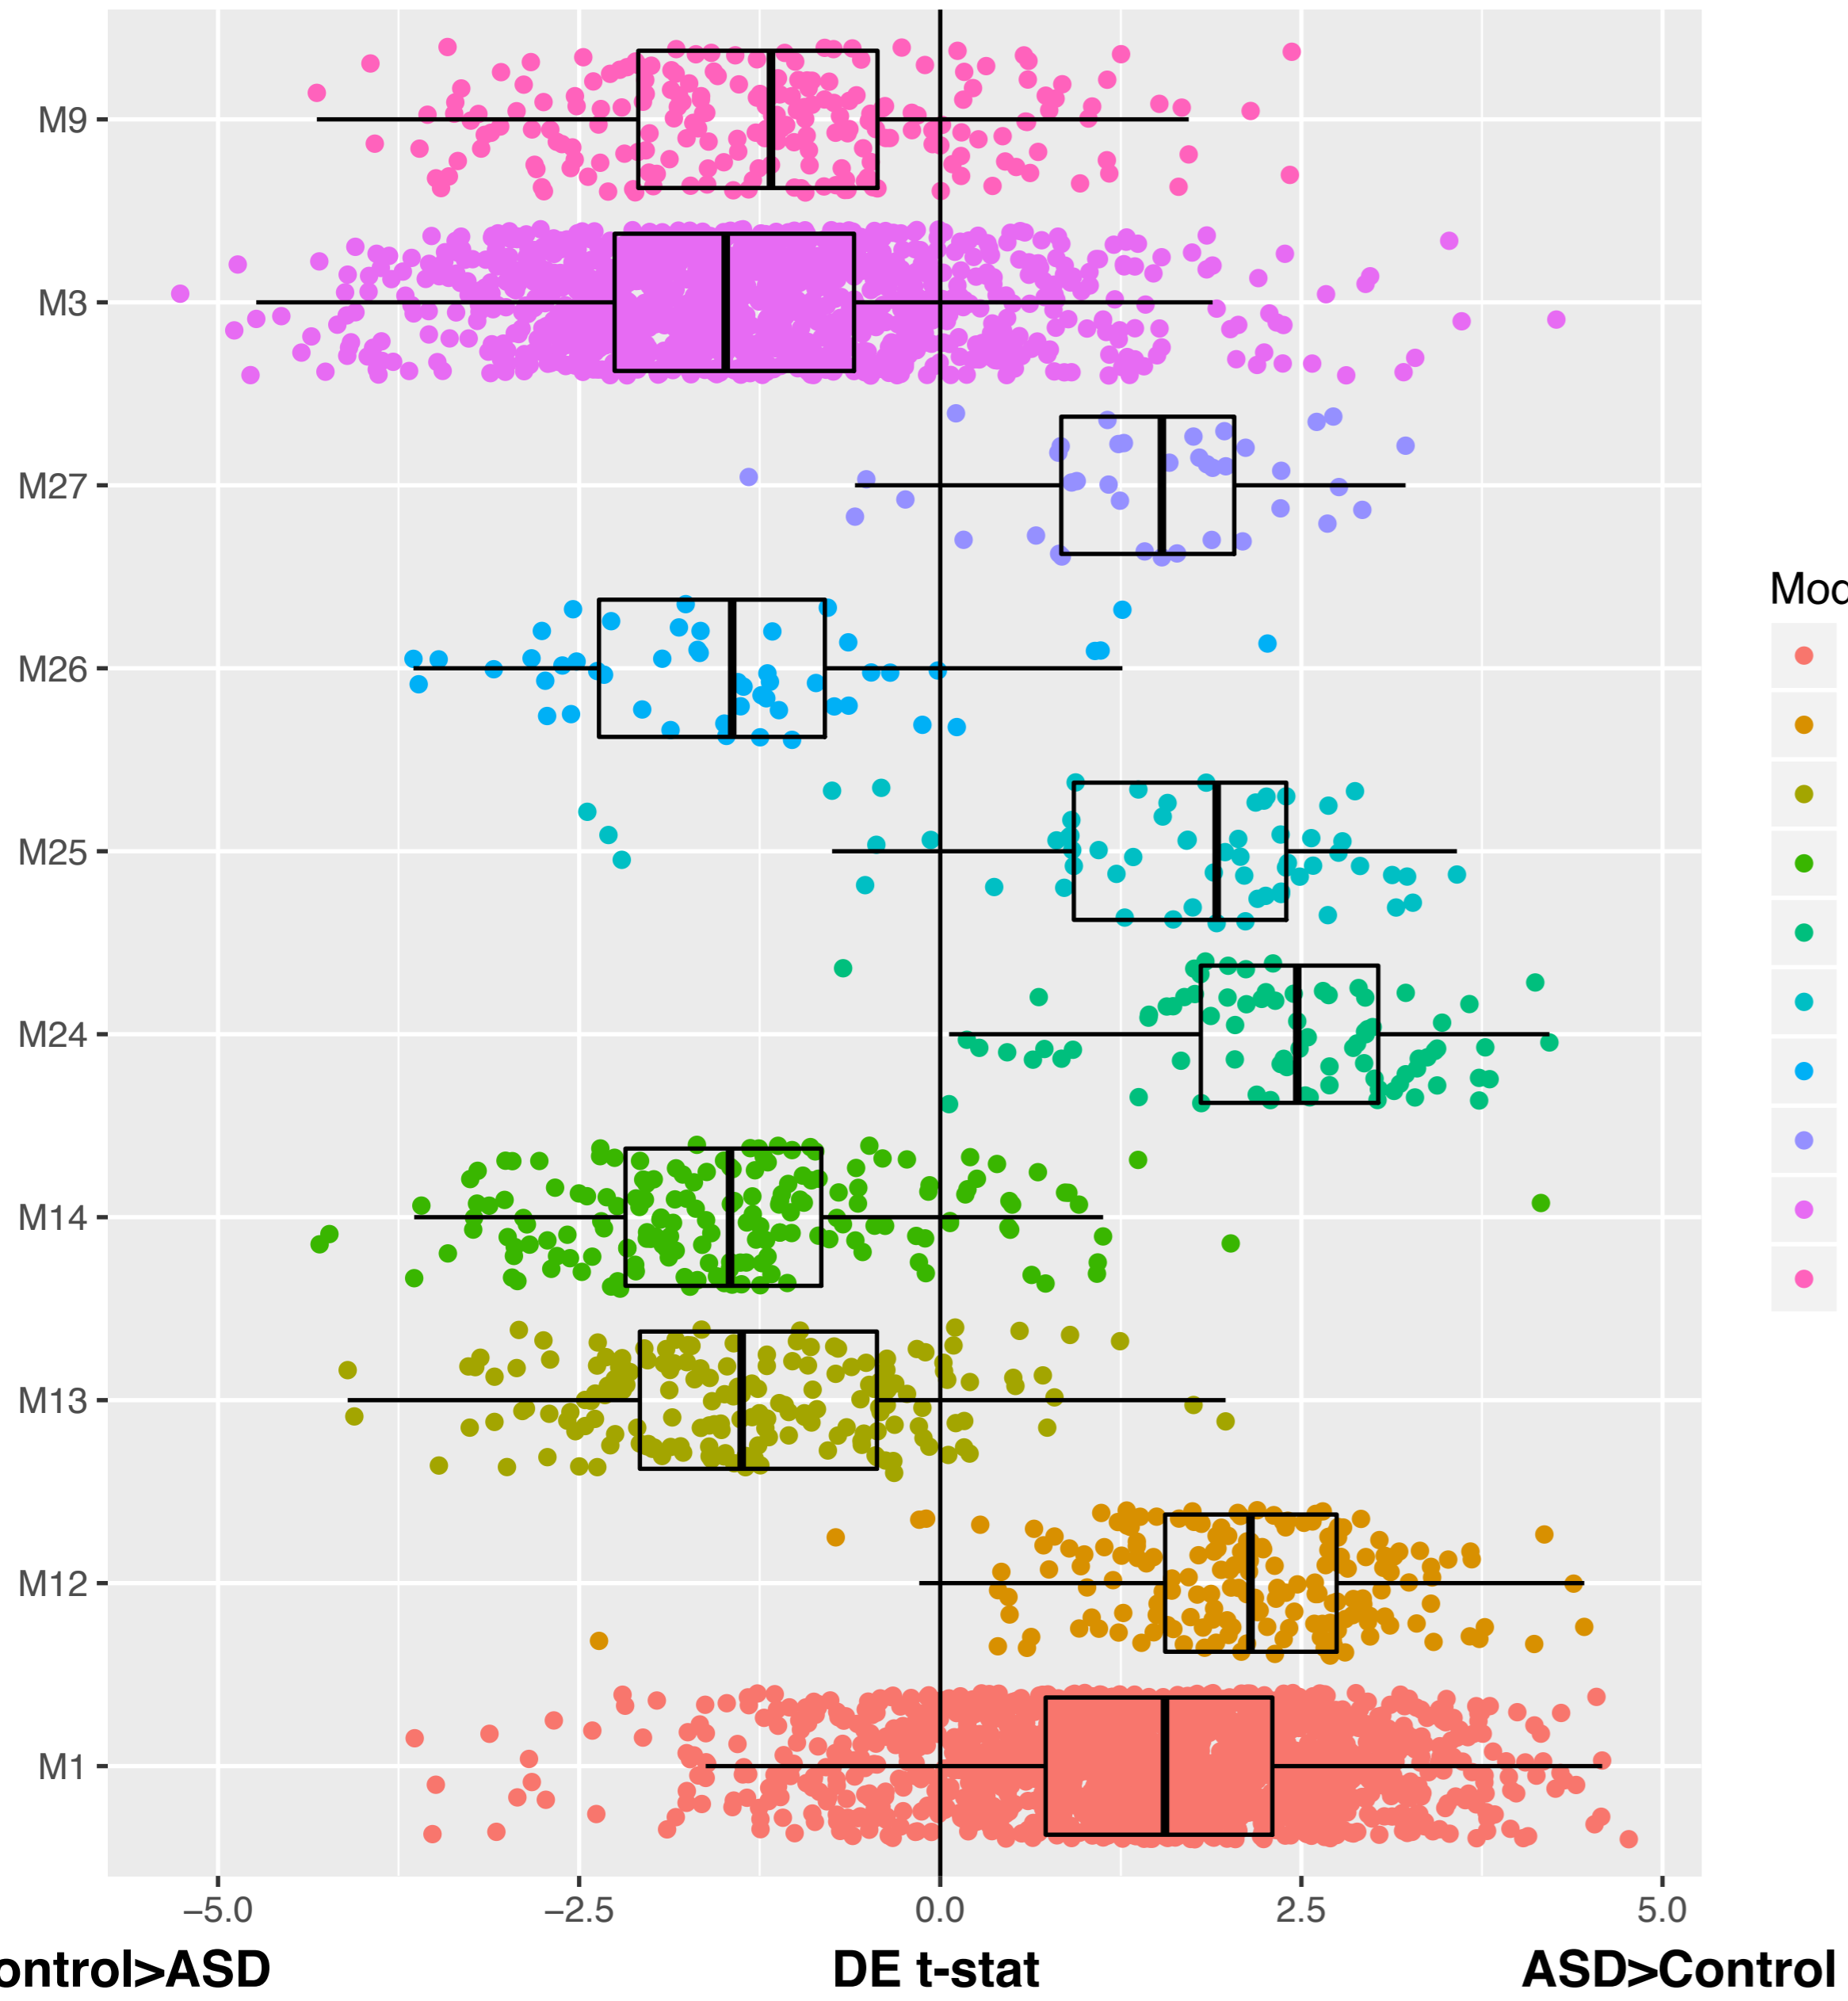

# Gupta

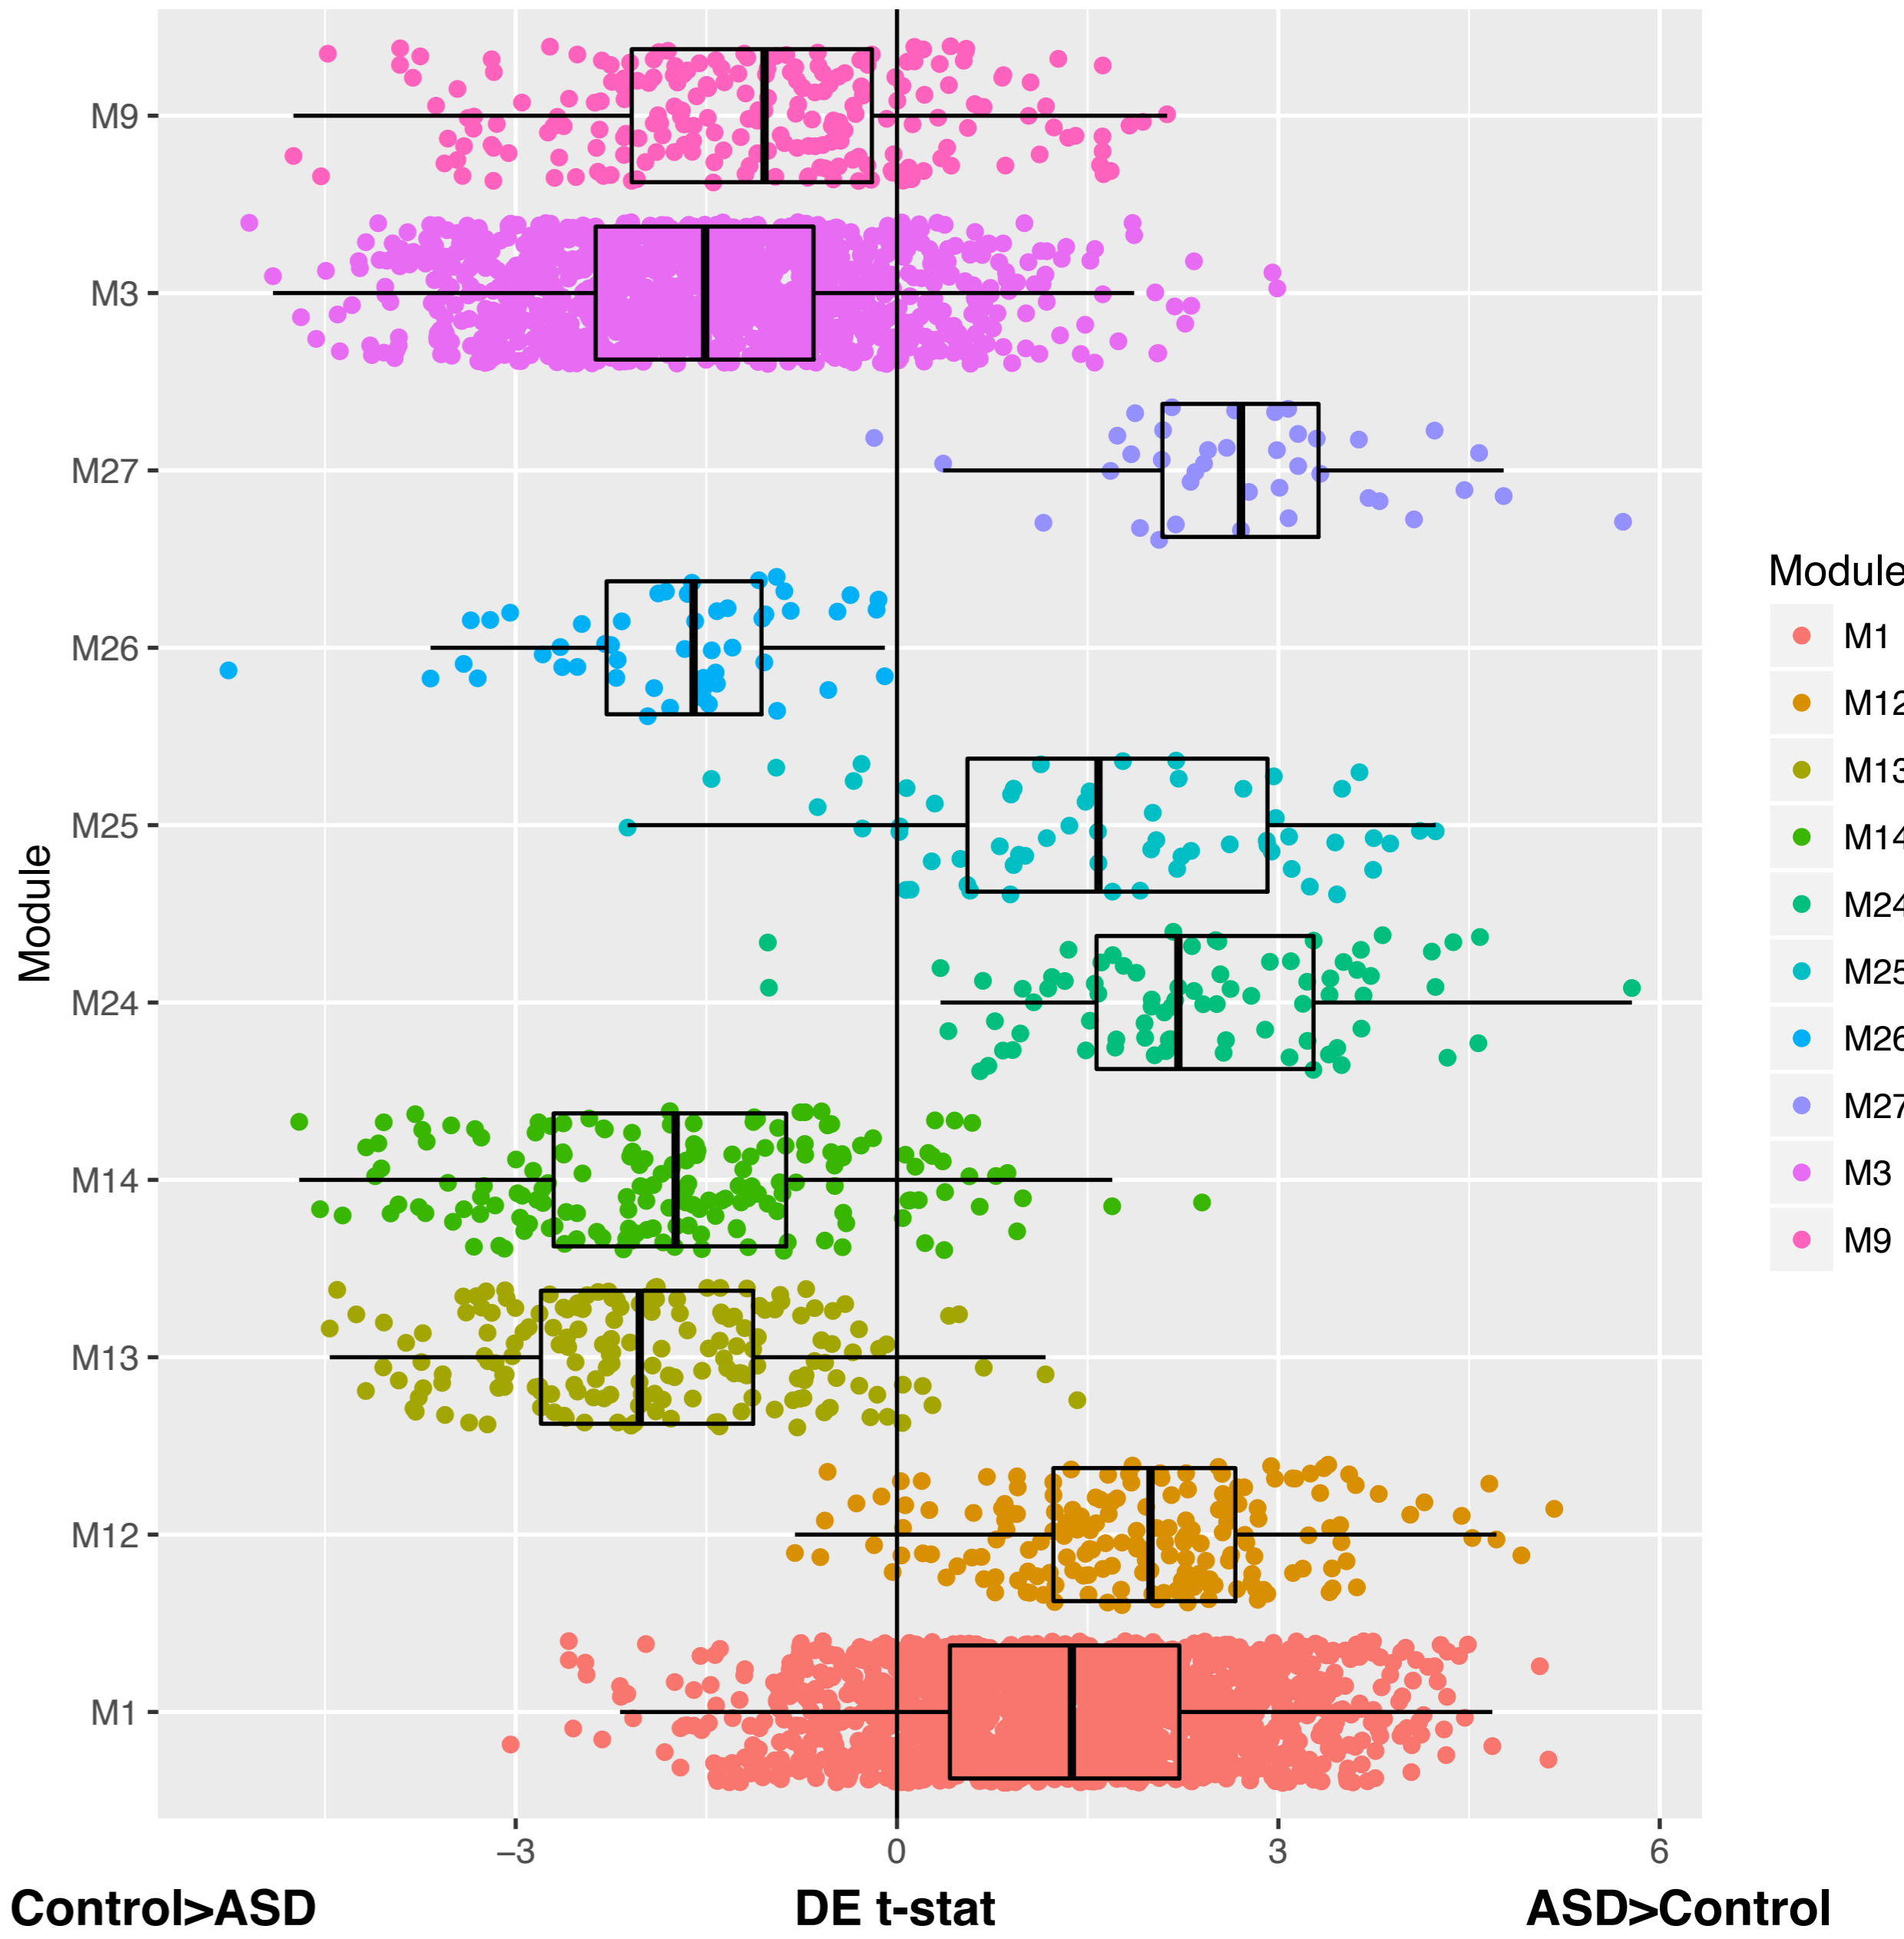

Module

- M1
- M12
- M13
- M14
- M24
- M25
- M26
- M27
- M3
- M9

Module

- M1
- M12
- M13
- M14
- M24
- M25
- M26
- M27
- M3
- M9
