# Supplementary material for: Hierarchical cortical transcriptome disorganization in autism
Source: Springer Nature journal article supplement (doi:10.1186/s13229-017-0147-7), 2017-06-21

**A****Voineagu Control**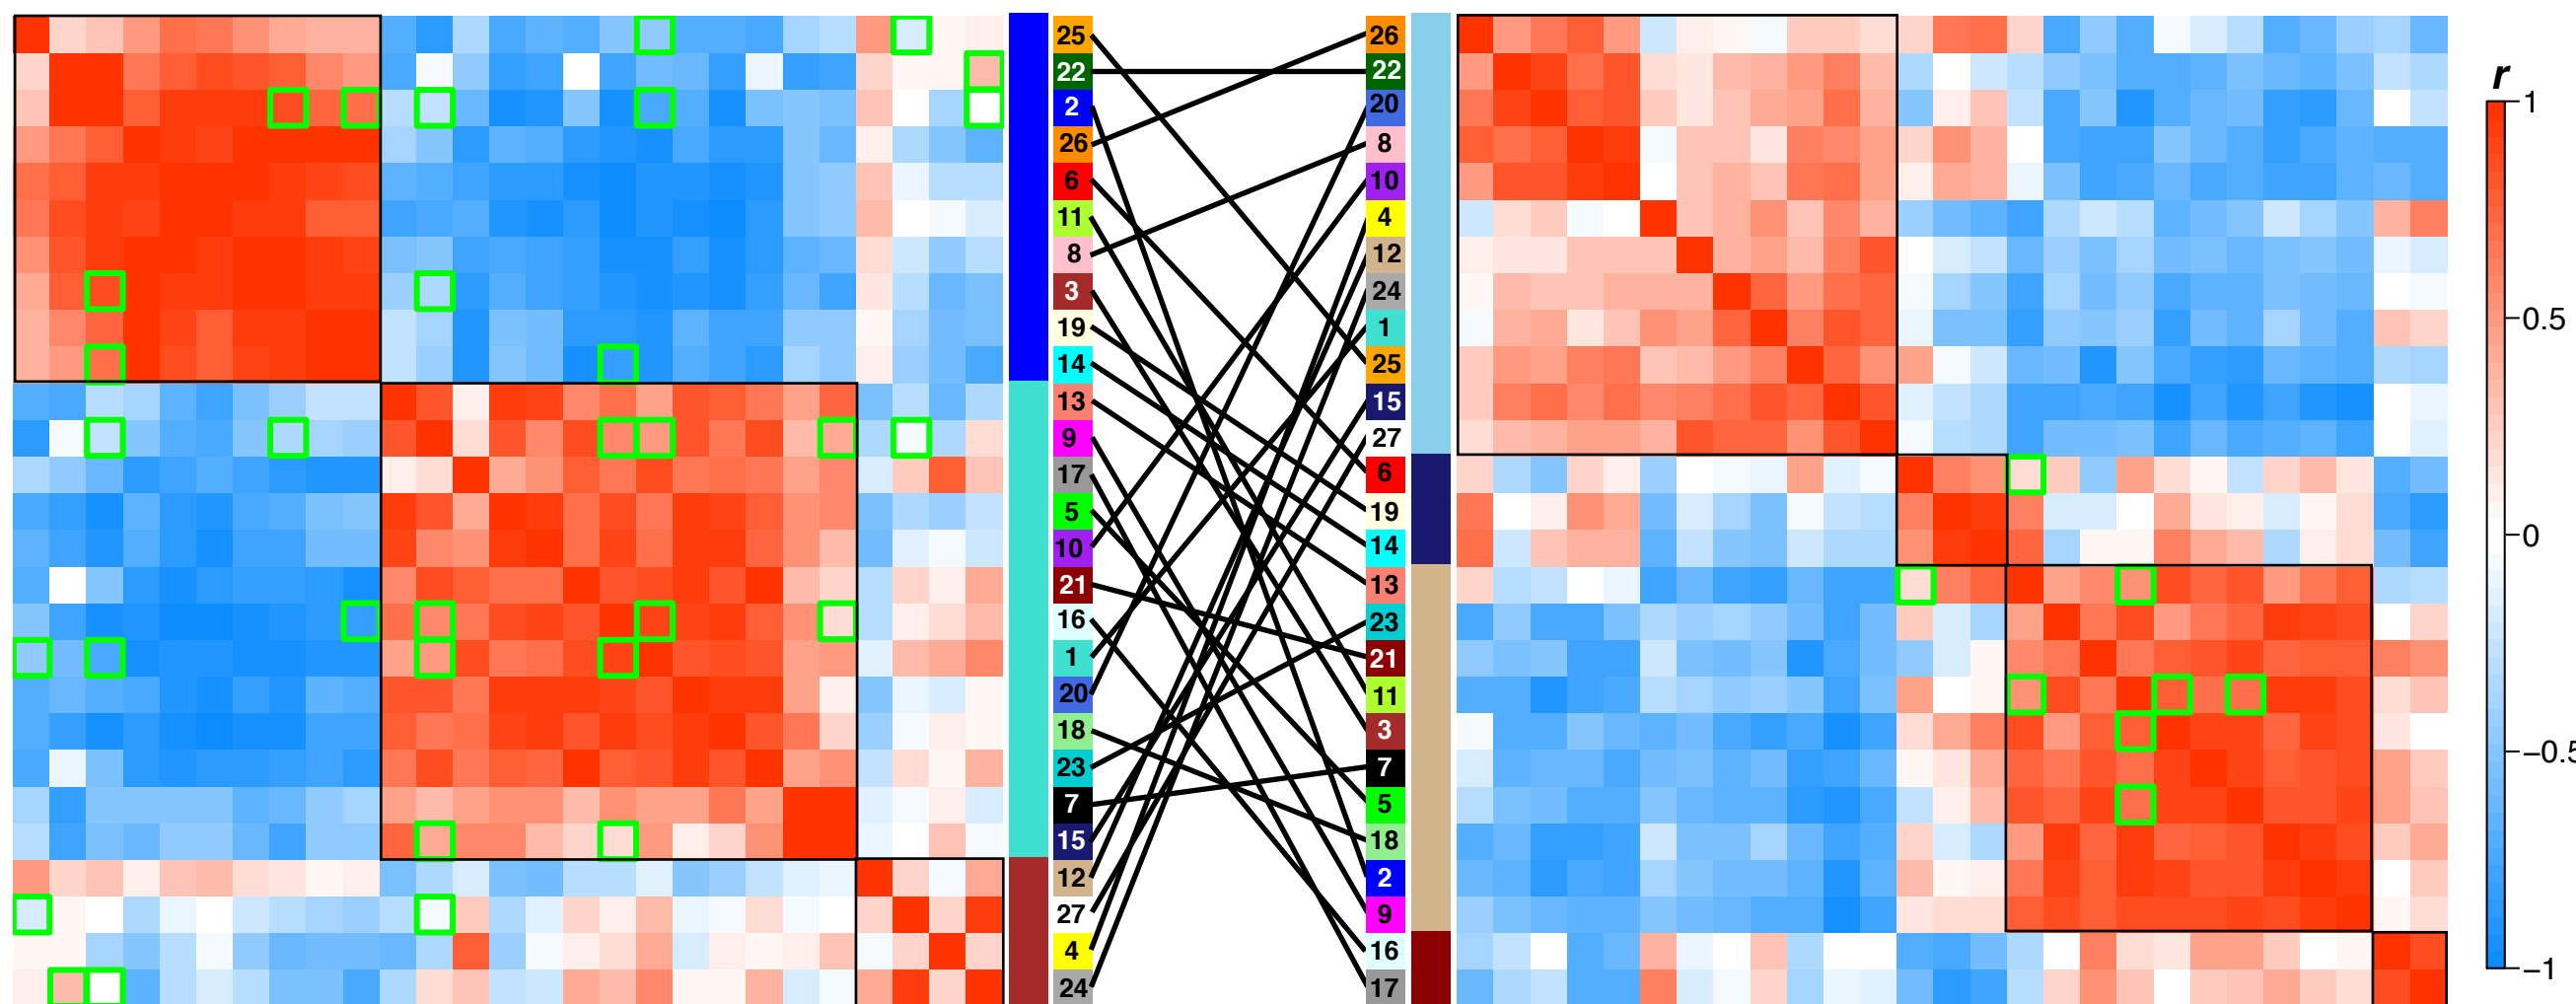**Gupta Control**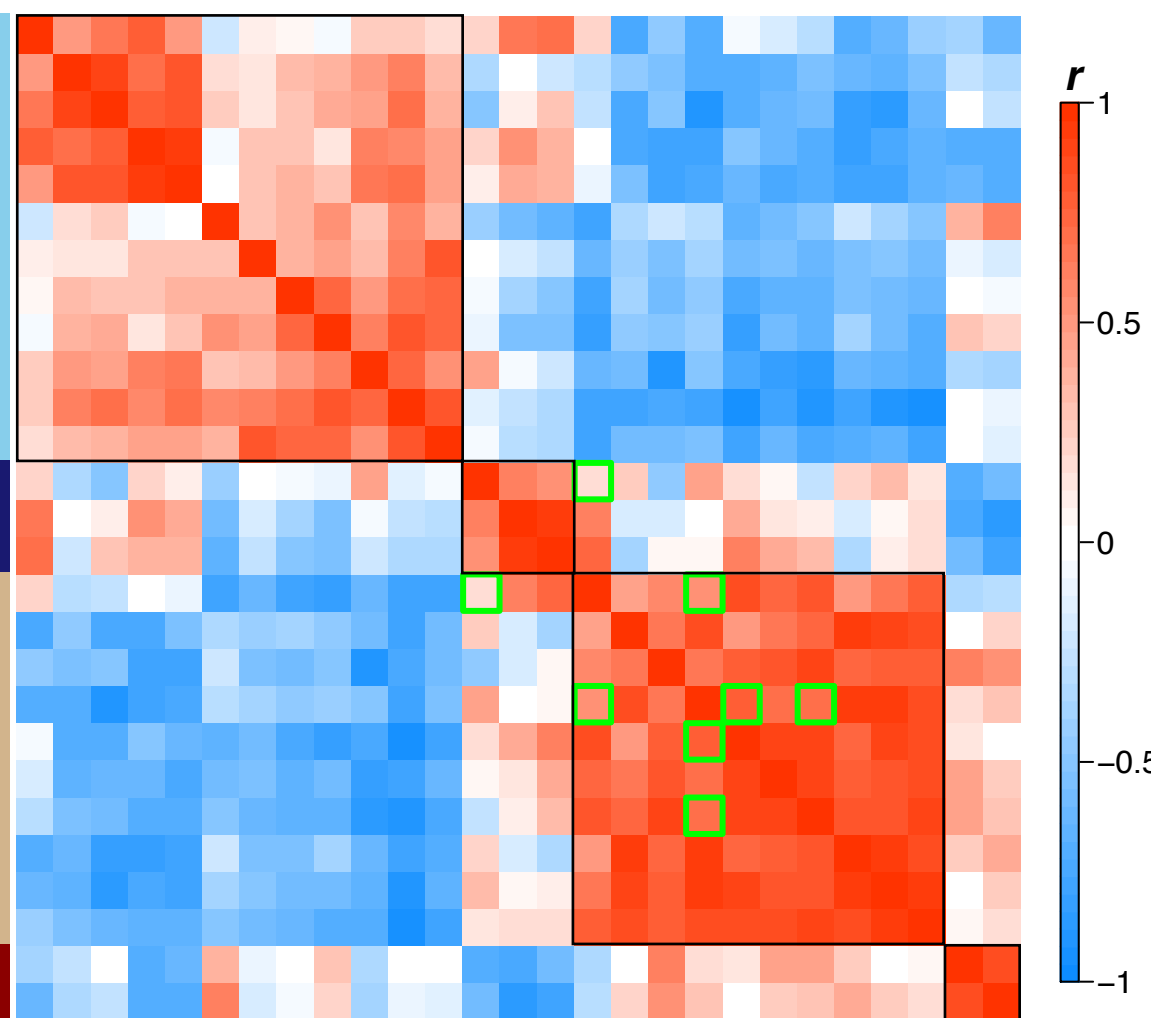**C****Average Preservation ( $D = 0.69$ )**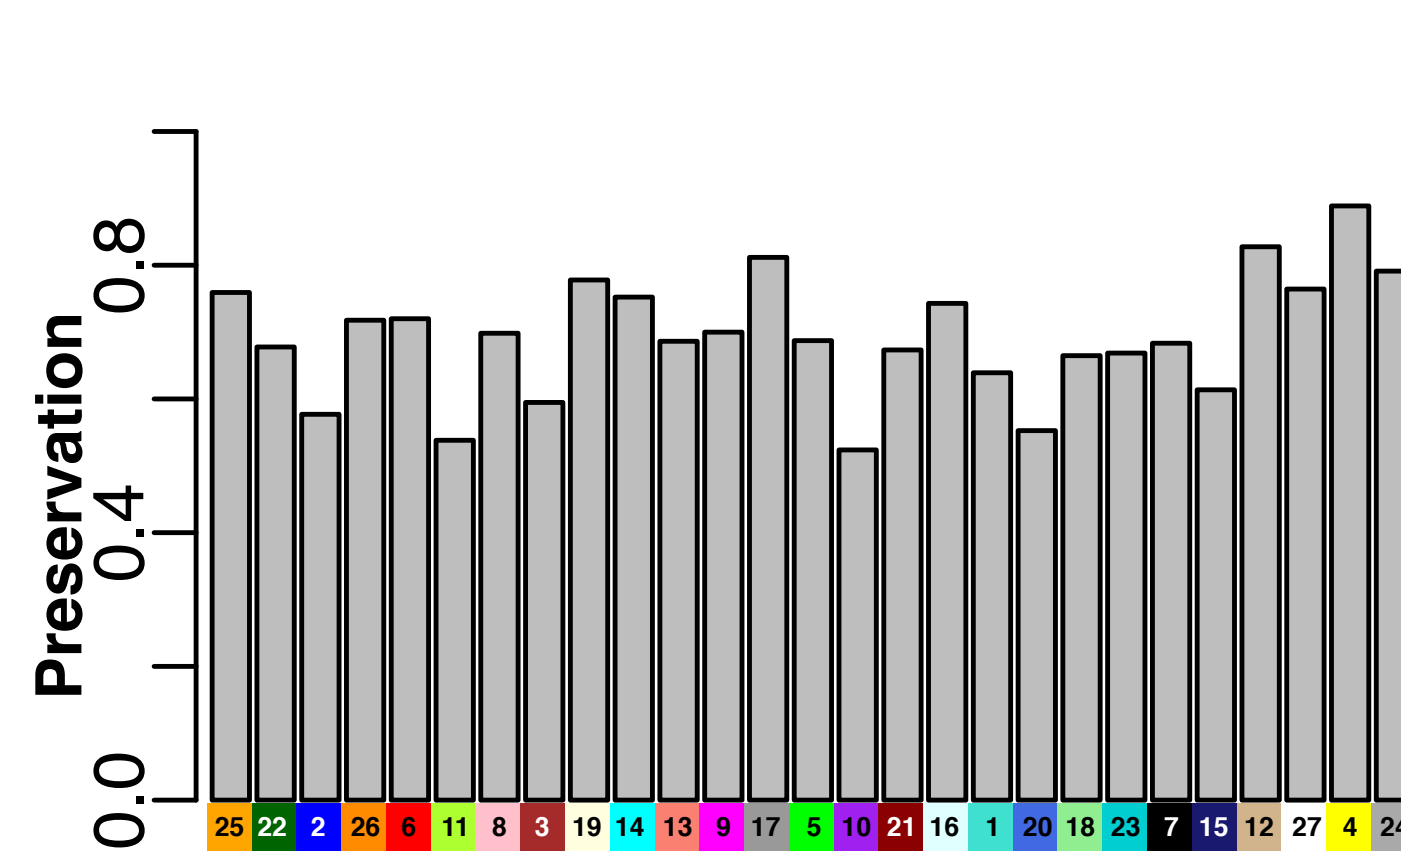**B**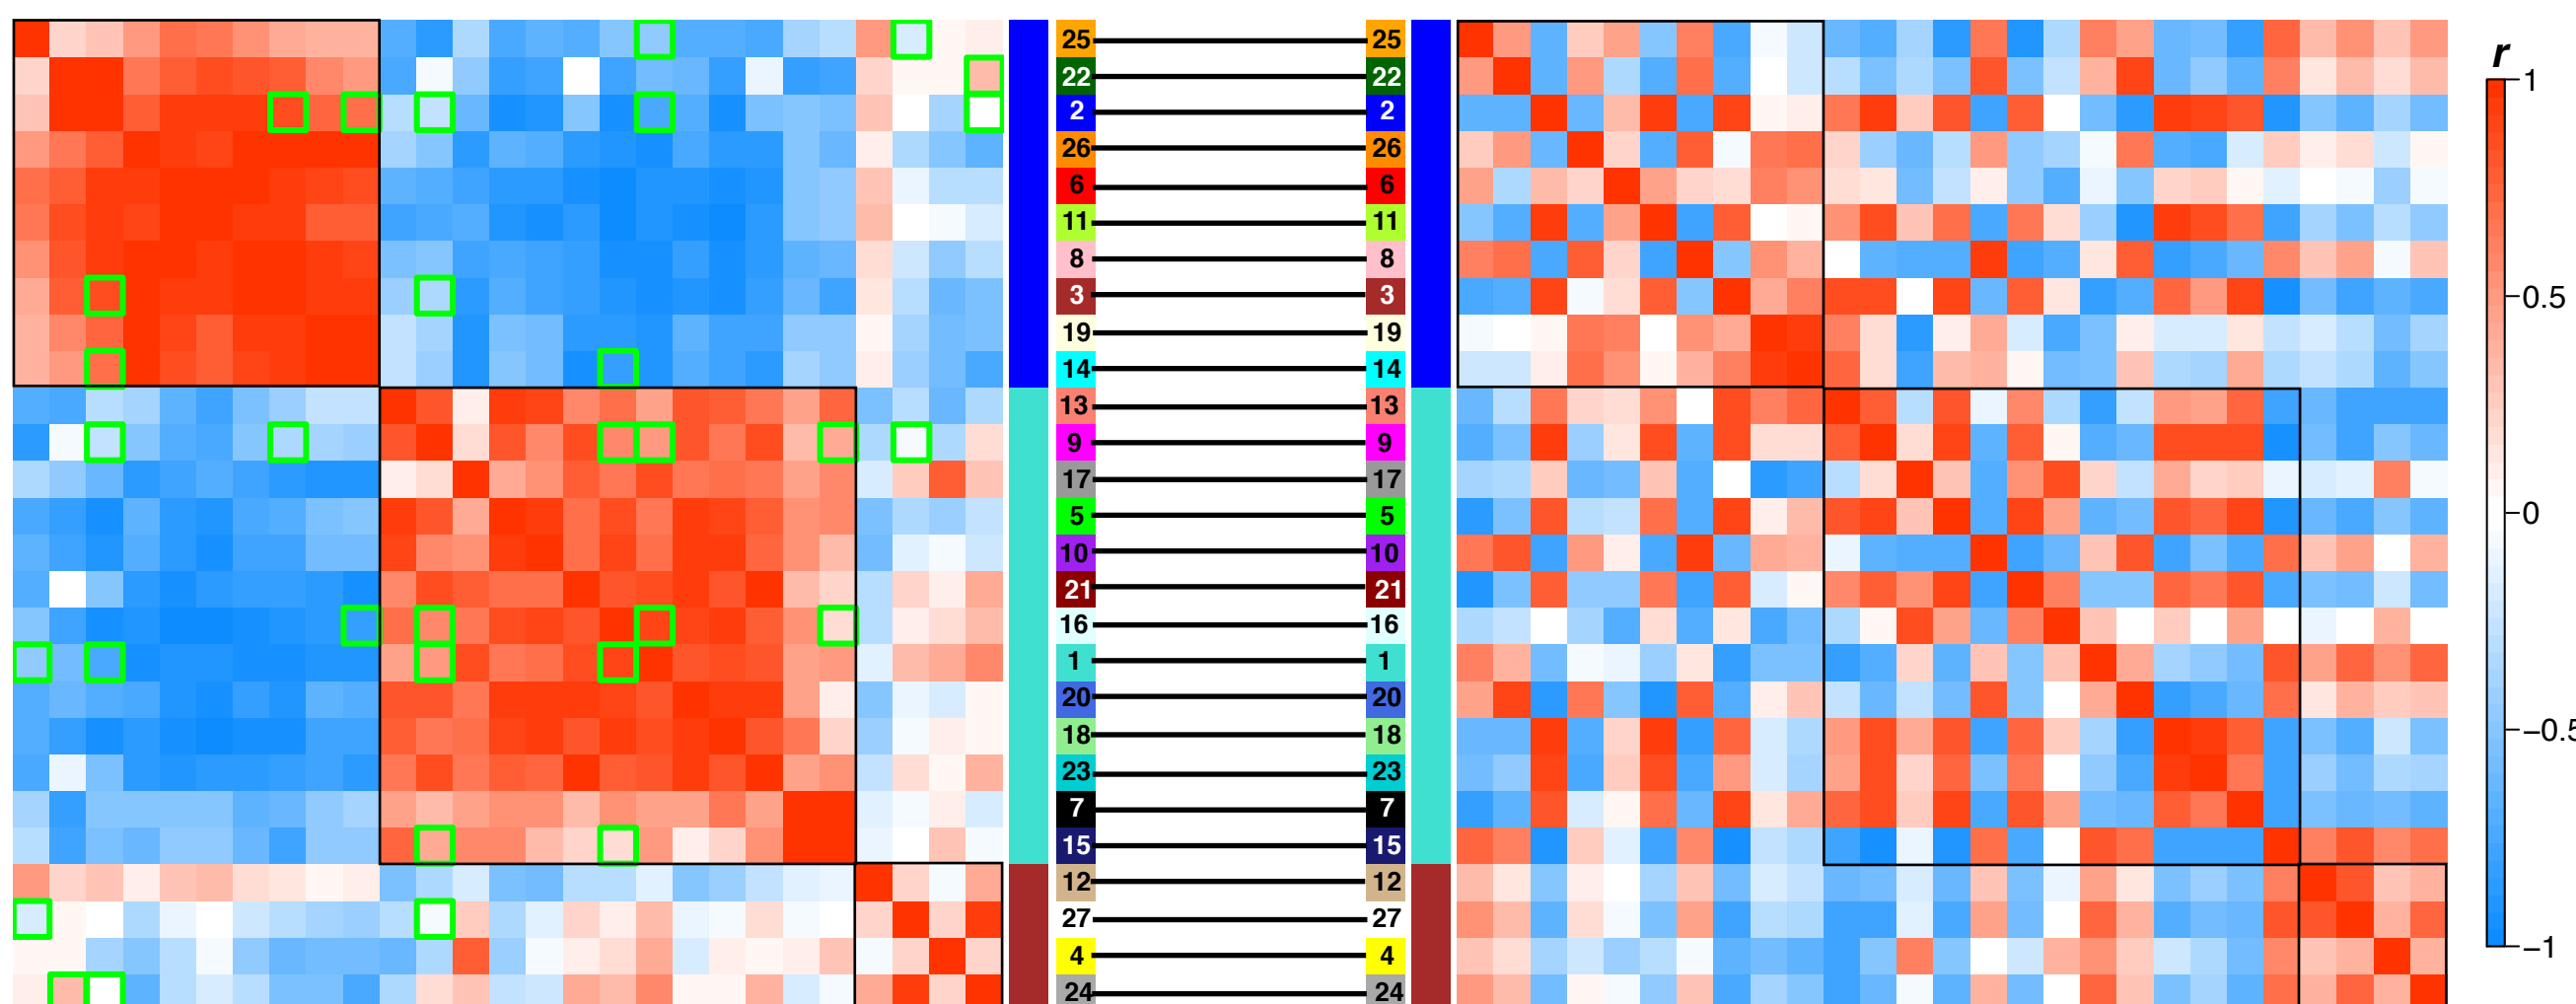**D****Preservation**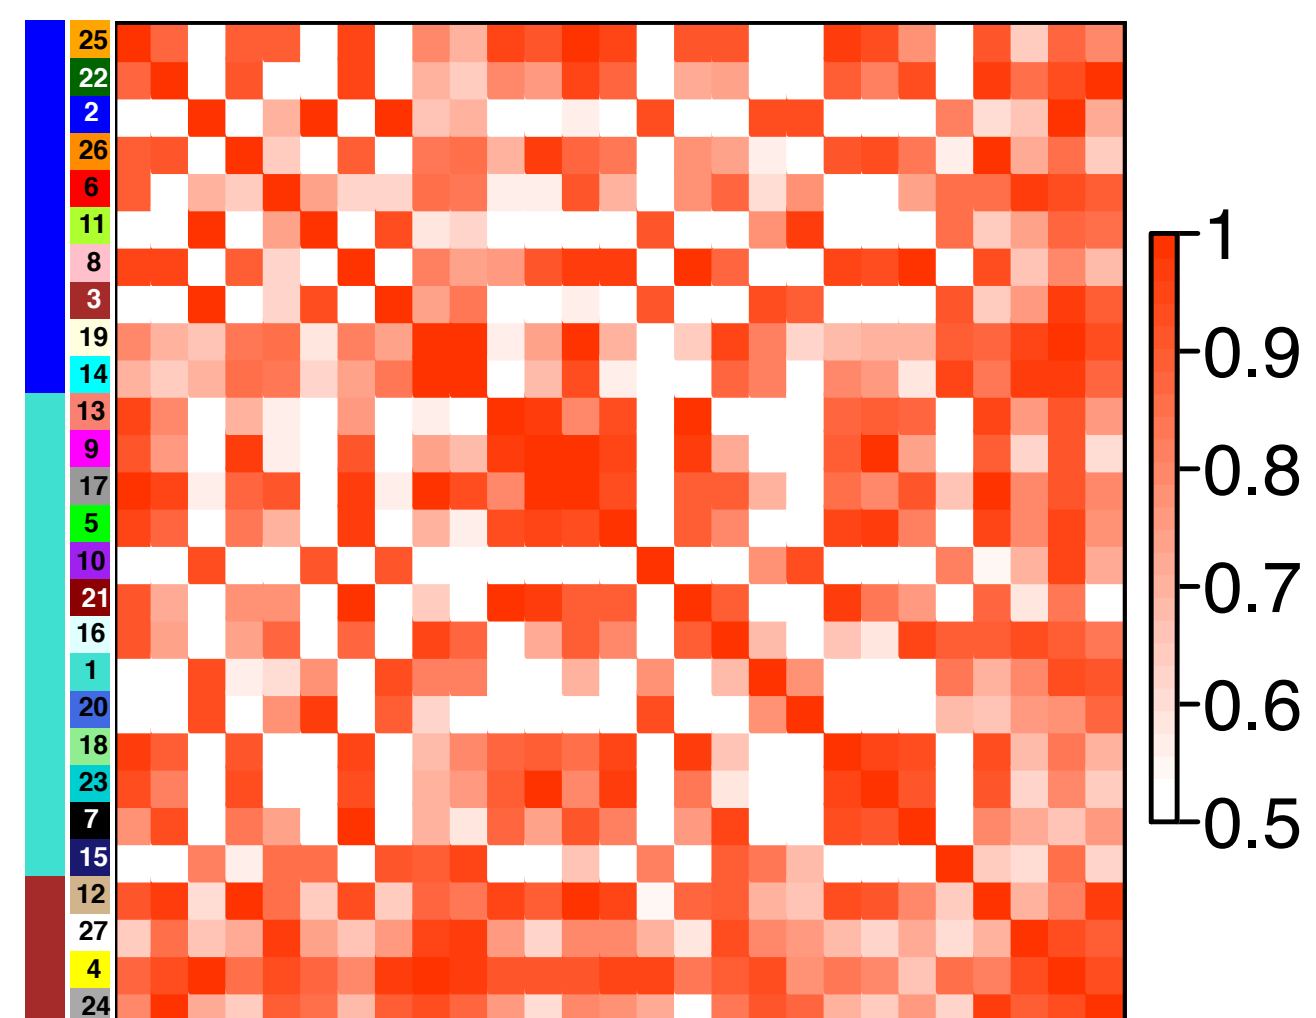

Supplement: MOESM7 [file 12461634]
